# Supplementary material for: Synergistic molecular assembly of an aptamer and surfactant on gold nanoparticles for the colorimetric detection of trace levels of As3+ions in real samples
Source: Royal Society of Chemistry journal article supplement (doi:10.1039/c8nj01097h), 2018-01-01
Supplement: c8nj01097h1.pdf [file c8nj01097h1.pdf]

Electronic Supplementary Information (ESI) of  
**Synergistic molecular assembly of aptamer and surfactant on gold nanoparticles for colorimetric detection of trace level As<sup>3+</sup> ion in real samples**

Nguyen Le Thao Nguyen<sup>a</sup>, Chan Yeong Park<sup>a</sup>, Jong Pil Park<sup>b</sup>, Suresh Kumar Kailasa<sup>\*a,c</sup>, and Tae Jung Park<sup>\*a</sup>

<sup>a</sup>Department of Chemistry, Institute of Interdisciplinary Convergence Research, Research Institute of Halal Industrialization Technology, Chung-Ang University, 84 Heukseok-ro, Dongjak-gu, Seoul 06974, Republic of Korea

<sup>b</sup>Department of Pharmaceutical Engineering, Daegu Haany University, Gyeongsan 38610, Republic of Korea

<sup>c</sup>Department of Applied Chemistry, S. V. National Institute of Technology, Surat – 395 007, Gujarat, India

\*Corresponding author. Tel.: +82 2 820 5220. Fax: +82 2 825 4736.

E-mail address: tjpark@cau.ac.kr (T.J.P.); sureshkumarchem@gmail.com (S.K.K.)

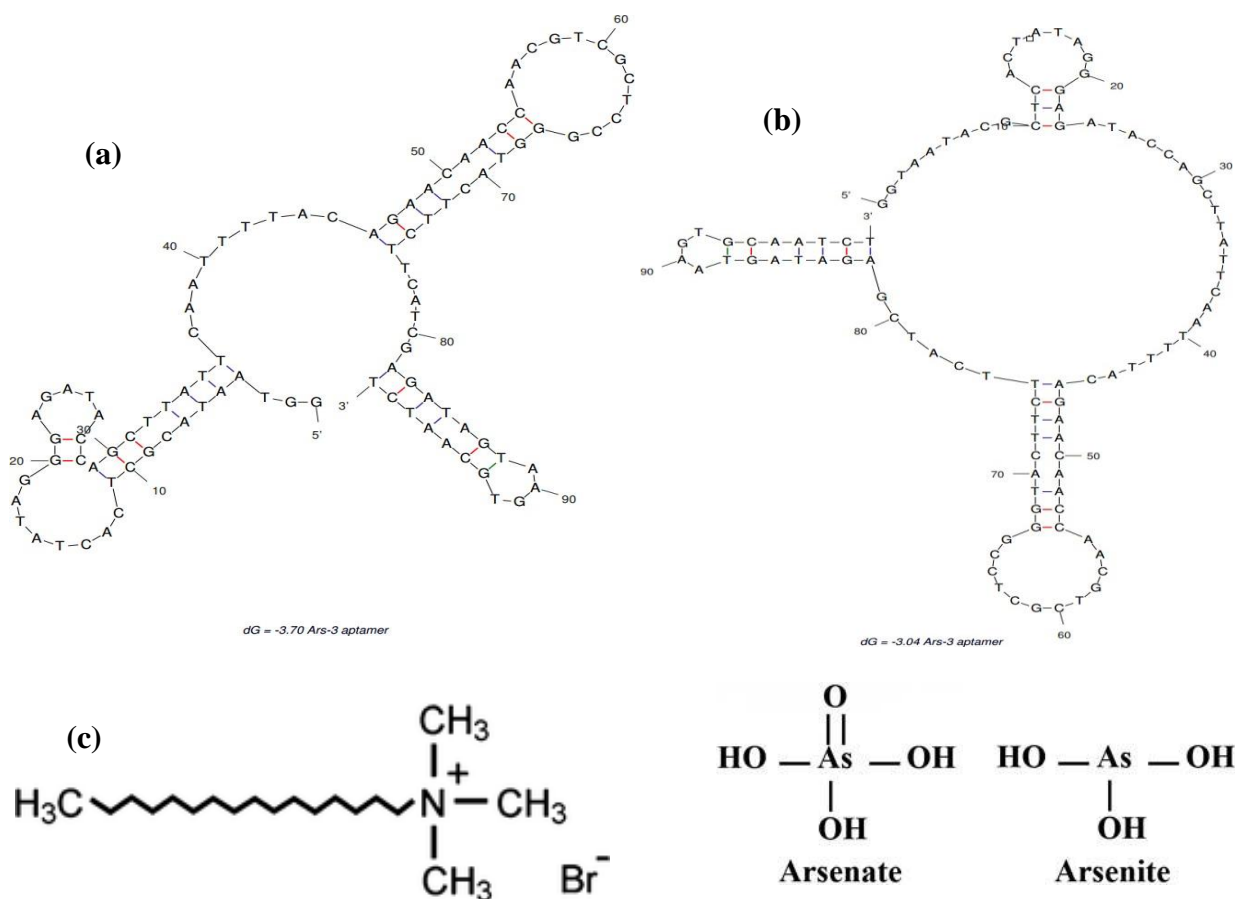

**Fig. S1.** Chemical structures of used compounds in As<sup>3+</sup> ion detection using aptamer-CTAB-AuNPs-based aptasensor. (a) Secondary structures of the selected DNA aptamers predicted using Zuker algorithm, m-fold. (5'-GGTAATACGACTCACTATAGGGAGAATACCAGCTTATTCAATTTACAGAACAACCAACGTCGCTCCGGGTACTTCTTCATCGAGATAGTAAGTGCATCT-3'), (b) structures of CTAB, (c) arsenate (As<sup>5+</sup>) and arsenite (As<sup>3+</sup>) ions.

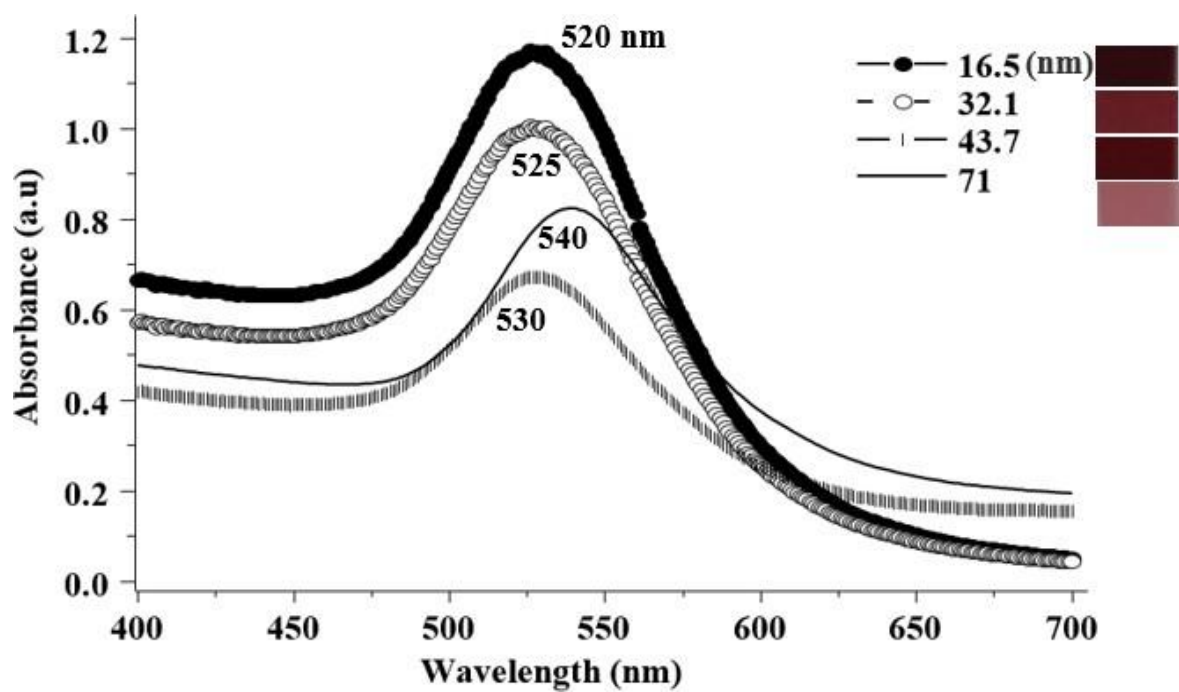

**Fig. S2** UV-visible absorption of AuNPs using different volumes (300, 240, 180, and 120 mL) of citrate with different sizes (16.5, 32.1, 43.7 and 71.0 nm) and the corresponding color of the AuNPs solutions.

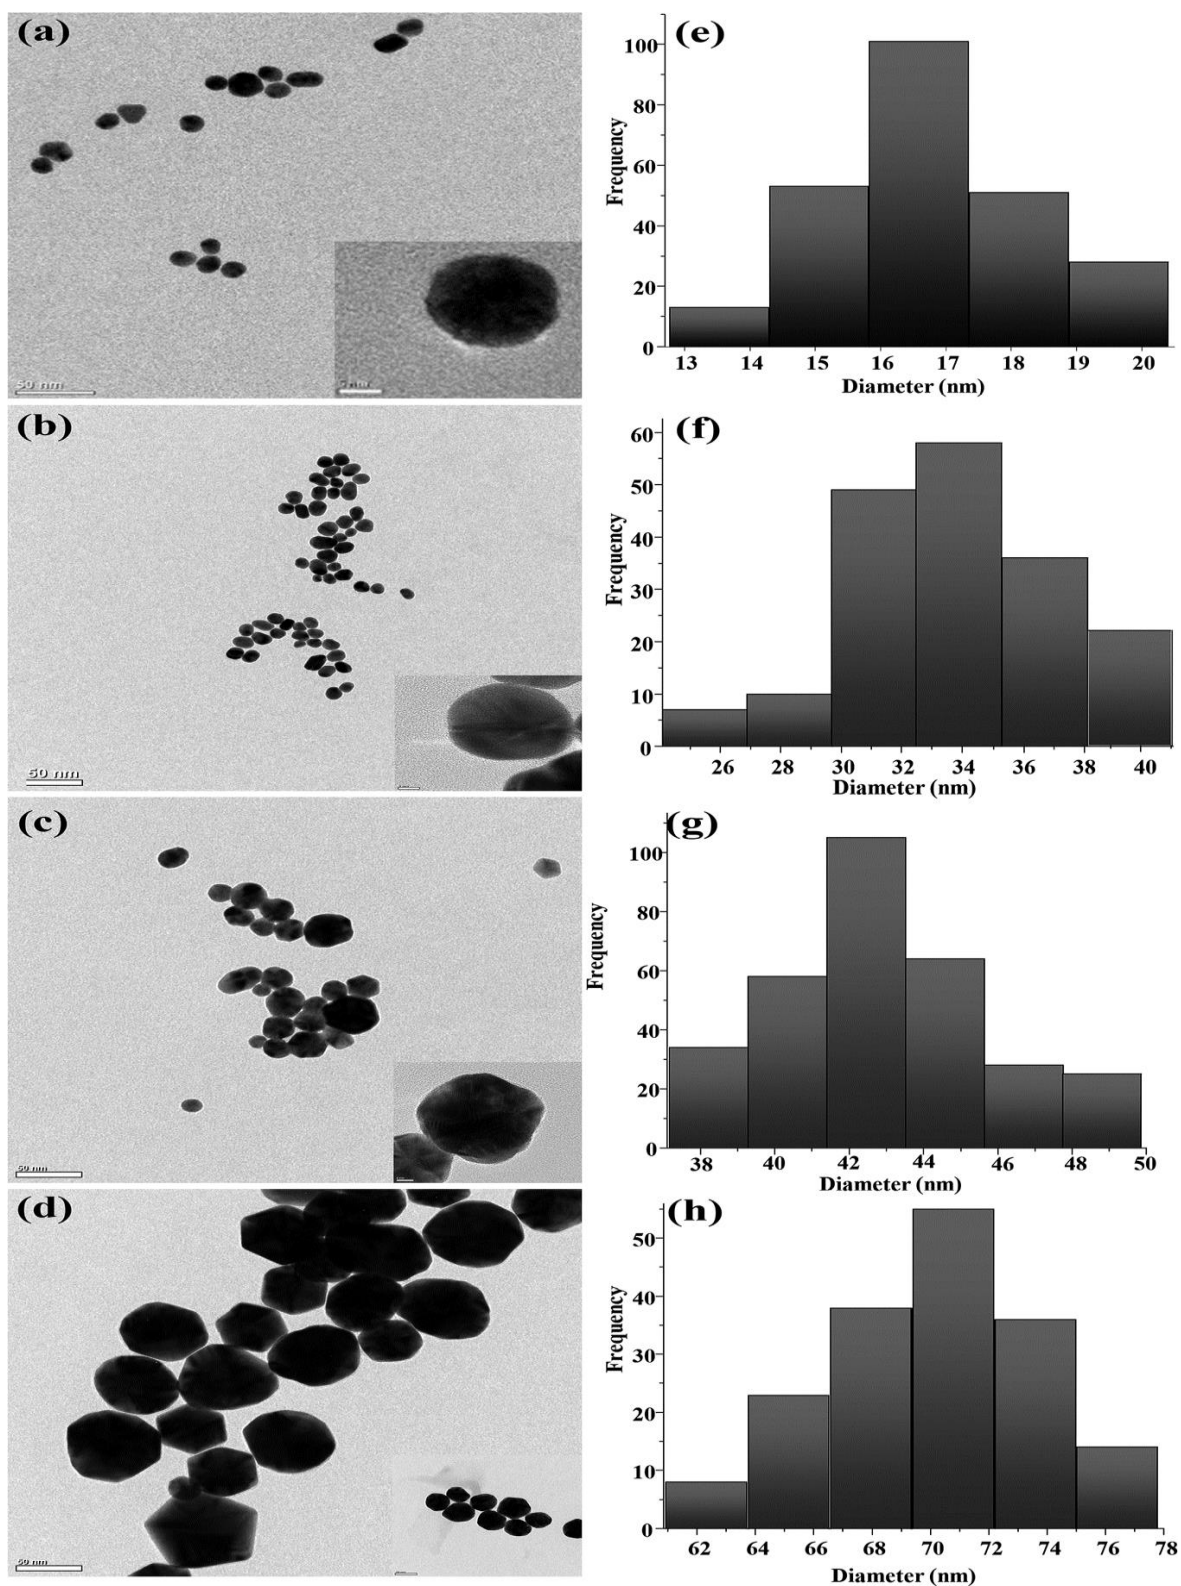

**Fig. S3.** TEM images and the corresponding histograms of AuNPs using (a, e) 300, (b, f) 240, (c, g) 180, and (d, h) 120 mL of citrate.

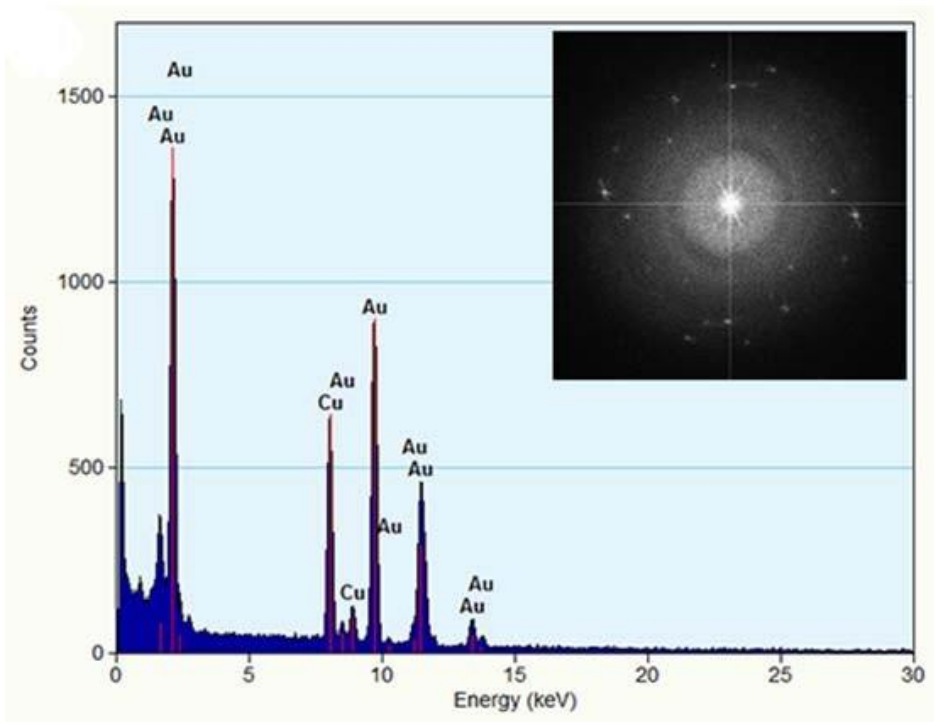

Fig. S4. Energy-dispersive X-ray spectrum of AuNPs.

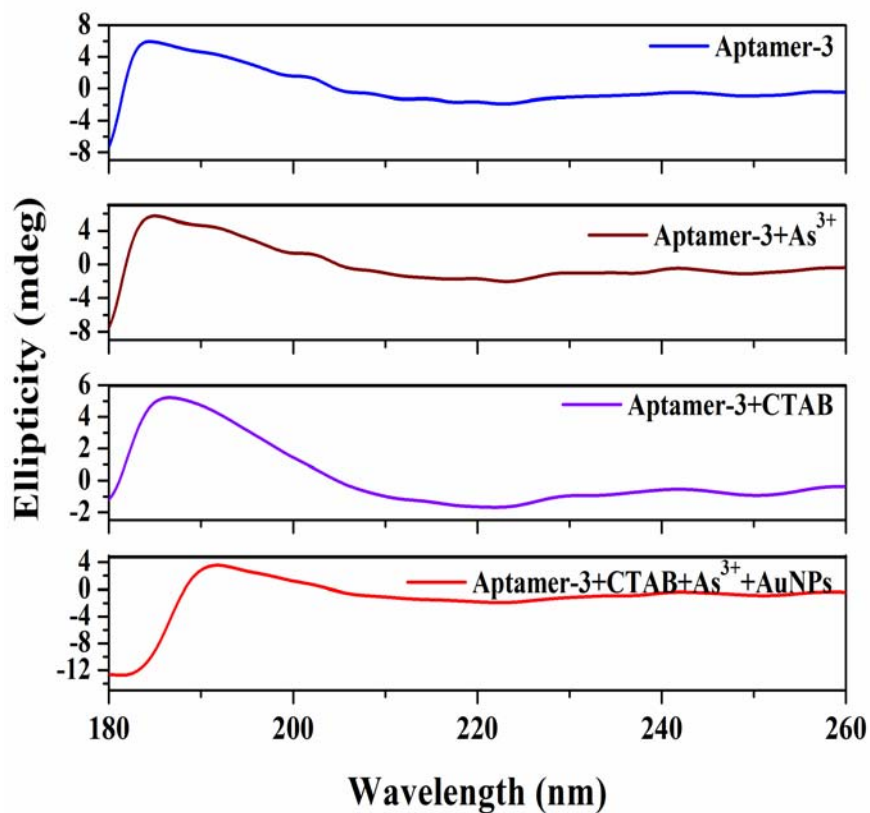

Fig. S5. CD spectra of aptamer-3, aptamer-3 + As<sup>3+</sup> ion, aptamer-3 + CTAB and aptamer-3 + CTAB + As<sup>3+</sup> ion + AuNPs.

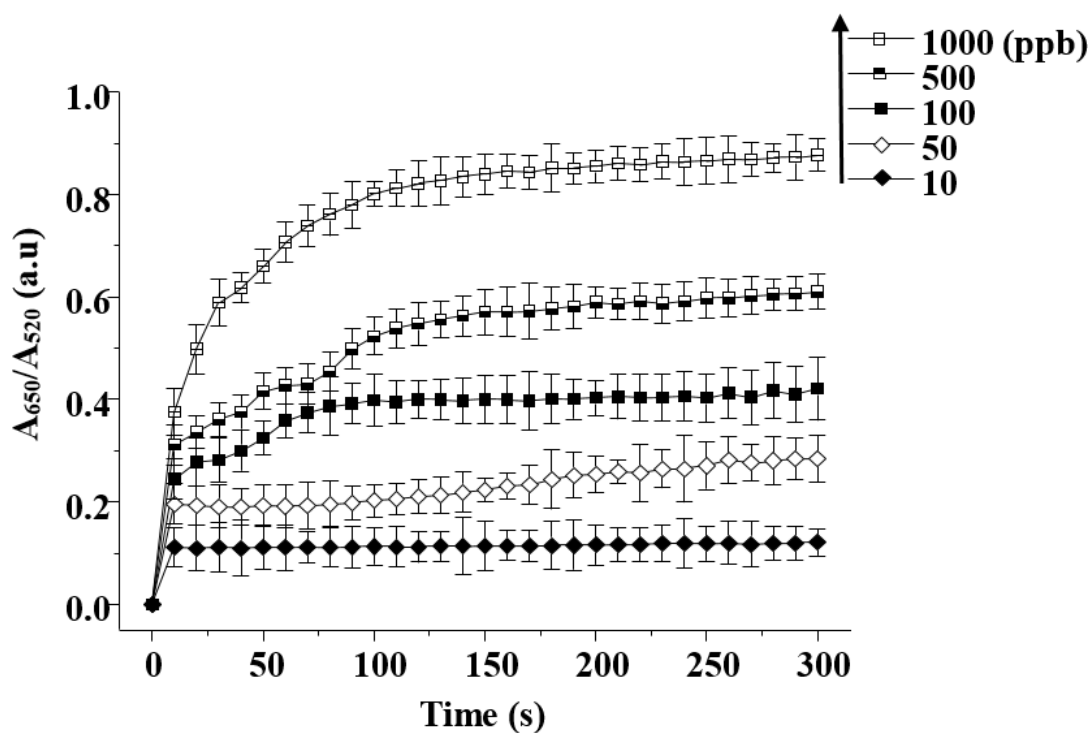

**Fig. S6.** Aggregation kinetics of AuNPs upon the addition of aptamer, CTAB and different concentrations of  $As^{3+}$  ion (10, 50, 100, and 1000 ppb) (n=3).

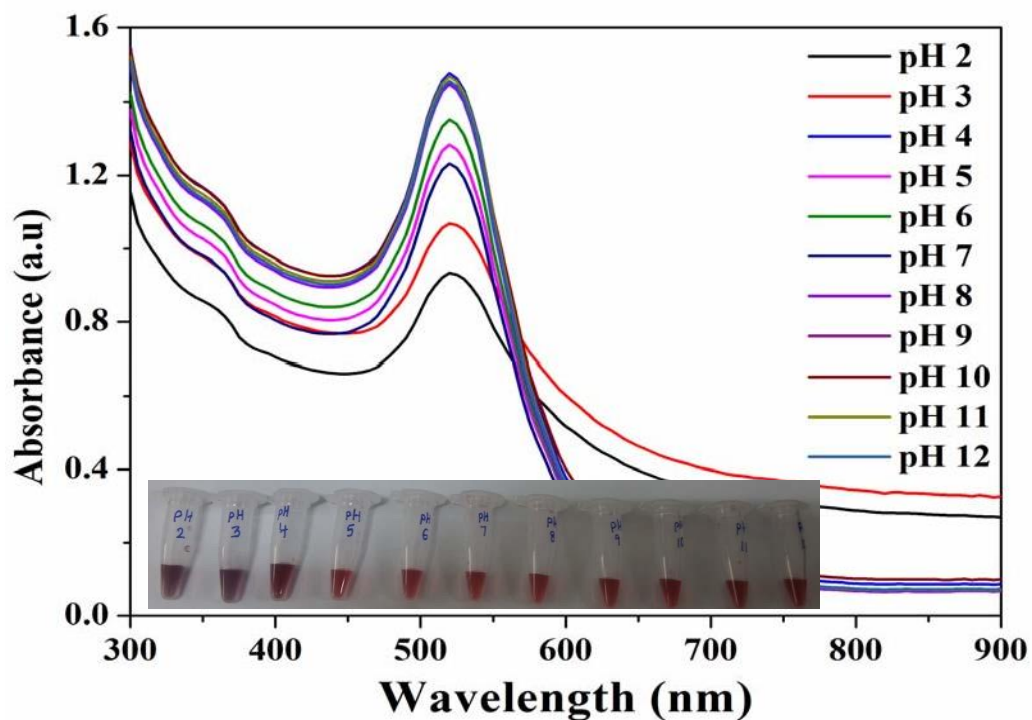

**Fig. S7.** Absorption spectra of AuNPs at different pHs from 2.0 – 12.0 without addition of aptamer-3, CTAB and  $As^{3+}$  ion. Inset: photographic image of corresponding solutions.

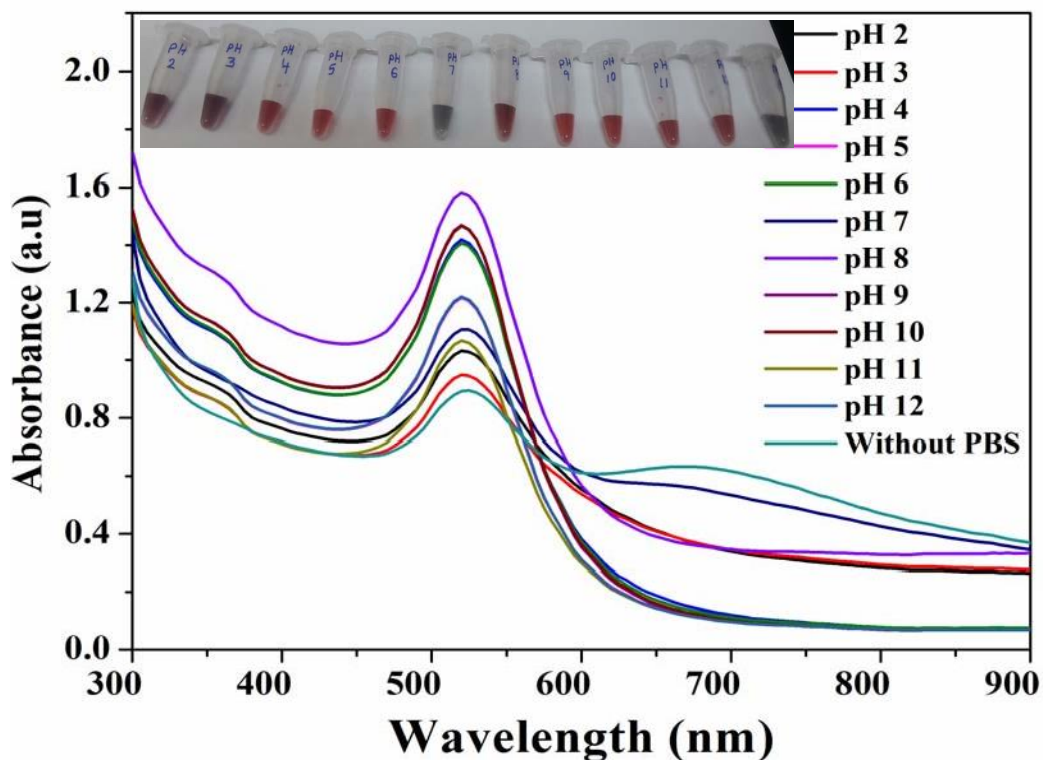

**Fig. S8.** Absorption spectra of AuNPs at different pHs from 2.0 – 12.0 with addition of aptamer-3, CTAB and  $\text{As}^{3+}$  ion and without addition of PBS buffer. Inset: photographic image of corresponding solutions.

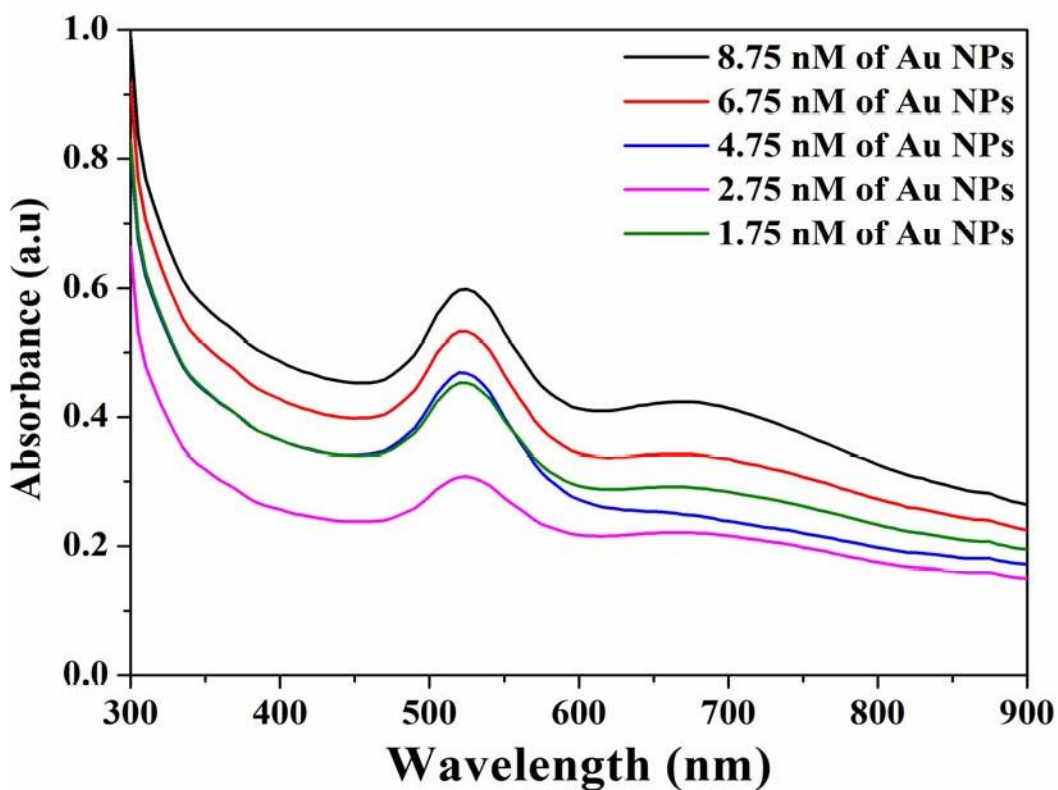

**Fig. S9.** Absorption spectra of different concentrations of AuNPs (8.75, 6.75, 4.75, 2.75 and 1.75 nM) with aptamer-3+CTAB+ $\text{As}^{3+}$  ion.

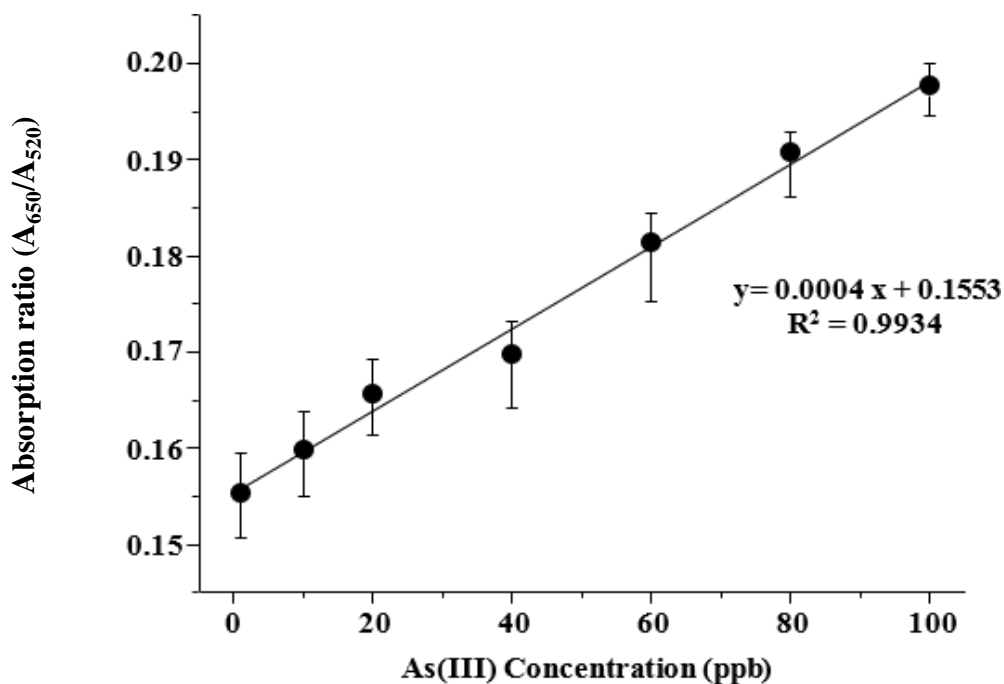

**Fig. S10.** The calibration curve plotted between the values of absorption ratio at  $A_{650}/A_{520}$  and concentration of  $As^{3+}$  ion in the range of 1.0 – 100 ppb.

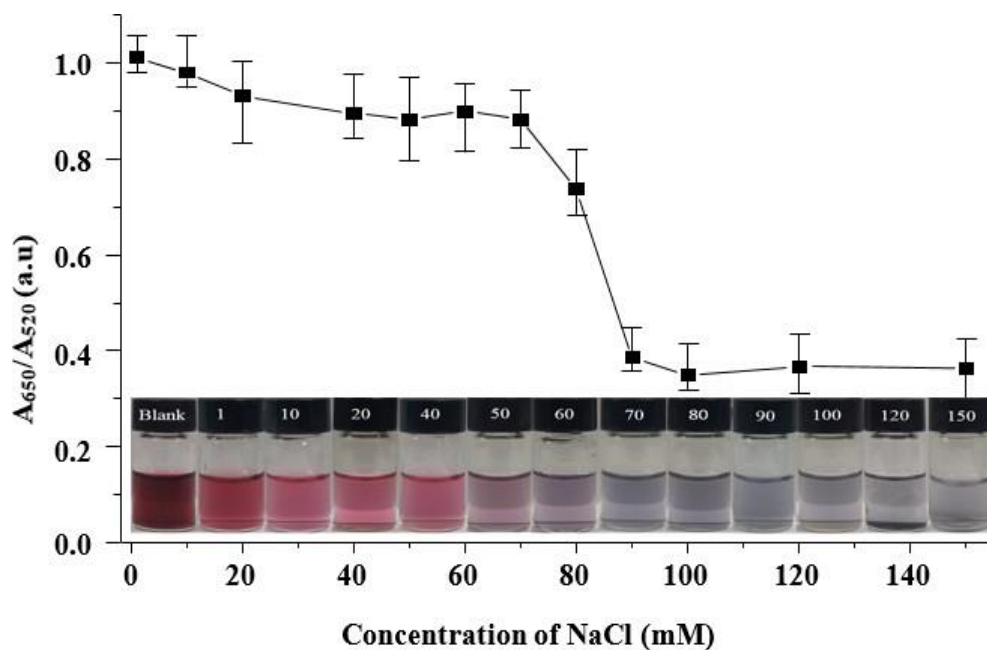

**Fig. S11.** Effect of NaCl concentration on the aggregation of AuNPs. The insert photograph shows the color change of AuNPs upon the addition of different concentrations of NaCl.

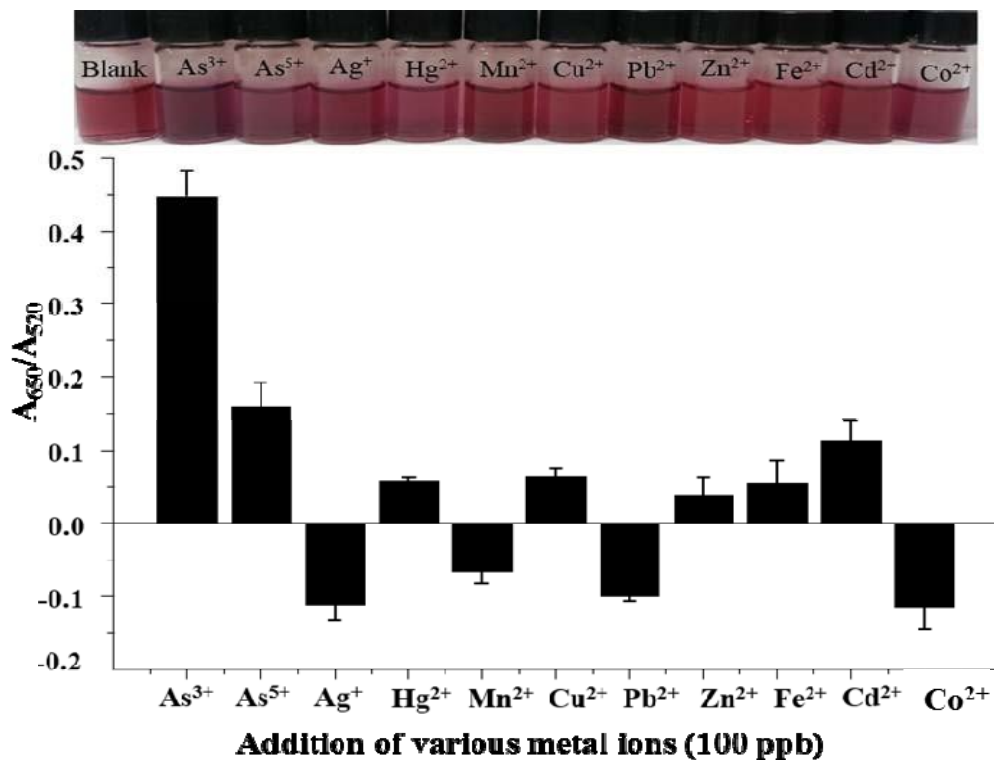

**Fig. S12.** Absorption ratio of AuNPs at  $A_{650}/A_{520}$  upon the addition of various metal ions including  $As^{3+}$  ion ( $Ag^+$ ,  $Cd^{2+}$ ,  $Hg^{2+}$ ,  $Mn^{2+}$ ,  $Cu^{2+}$ ,  $Mg^{2+}$ ,  $Fe^{2+}$ ,  $Co^{2+}$ ,  $As^{3+}$  and  $As^{5+}$  ion, 1000 ppb) in the presence of aptamer and CTAB.

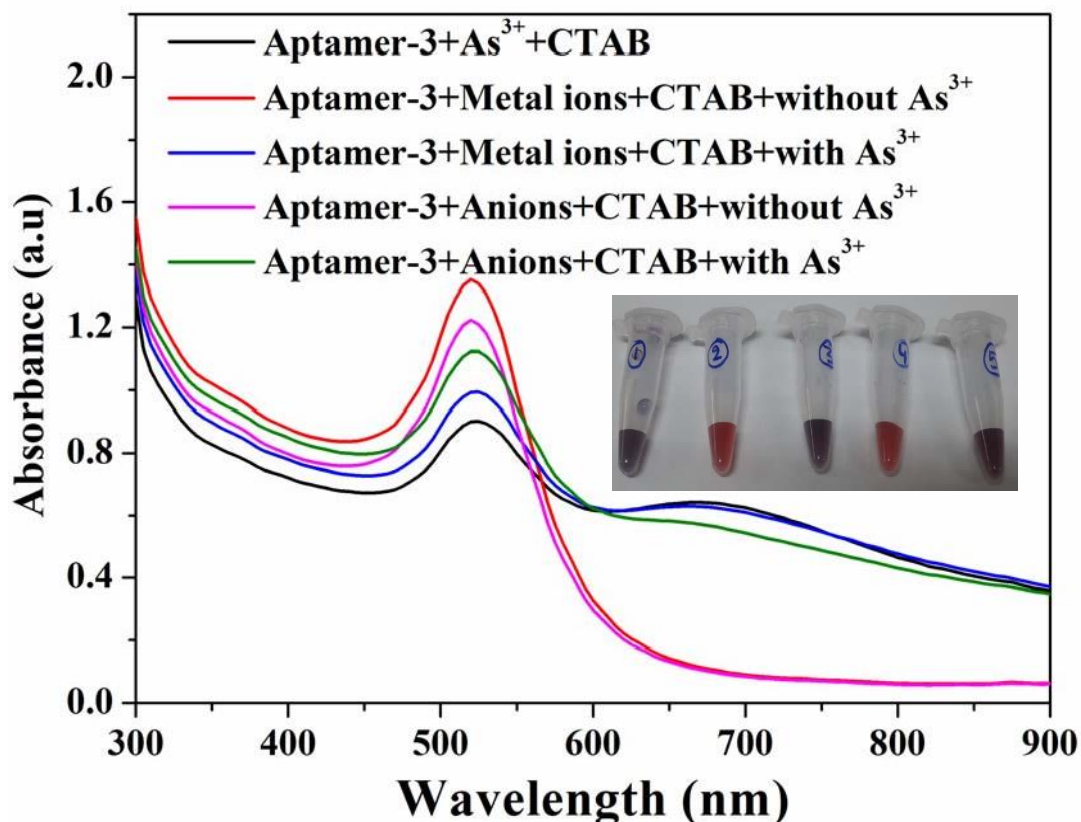

**Fig. S13.** Absorption spectra of AuNPs with aptamer-3+CTAB+ $As^{3+}$  ion (black line) and without  $As^{3+}$  ion in the presence of mixture of metal ions ( $Ba^{2+}$ ,  $Ca^{2+}$ ,  $Cu^{2+}$ ,  $Hg^{2+}$ ,  $Zn^{2+}$ ,  $Ni^{2+}$ ,  $Fe^{2+}$  and  $Al^{3+}$  100 ppb) and mixture of anions ( $Cl^-$ ,  $F^-$ ,  $Br^-$ ,  $I^-$ ,  $SO_4^{2-}$ ,  $S^{2-}$ ,  $PO_4^{3-}$  and  $Cr_2O_7^{2-}$ , 100 ppb). Inset: photographic image of corresponding solutions.



**Table S1.** Analytical performance of different sizes of AuNPs for detection of As<sup>3+</sup> ion using aptamer as an aptasensor and CTAB as a binder (n=3)

| <b>AuNPs size (nm)</b> | <b>Zeta potential (mV)</b> | <b>Wavelength (nm)</b> | <b>Range (ppb)</b> | <b>LOD (ppb)</b> |
|------------------------|----------------------------|------------------------|--------------------|------------------|
| 16.5                   | -41.7                      | 520                    | 1–100              | 16.9             |
| 32.1                   | -46.1                      | 525                    | 1–100              | 25.1             |
| 43.7                   | -14.5                      | 530                    | 1–100              | 31.4             |
| 71.0                   | -25.6                      | 540                    | 1–100              | 86.3             |

**Table S2.** Comparison of CTAB as a binder and NaCl as ionic strength for the detection of As<sup>3+</sup> ion using aptamer-AuNPs-based aptasensor

| <b>Samples</b>                              | <b>CTAB</b>     | <b>NaCl</b>      |
|---------------------------------------------|-----------------|------------------|
| <b>AuNPs changes to purple (mM)</b>         | 1.1             | 50.0             |
| <b>AuNPs changes to blue (mM)</b>           | 1.6             | 70.0             |
| <b>Reaction time (min)</b>                  | <5              | <10              |
| <b>Concentration range</b>                  | 0.4–1.6 $\mu$ M | 1–150 mM         |
| <b>Temperature (<math>^{\circ}</math>C)</b> | 24–25           | Room temperature |
| <b>Size (nm)</b>                            | 16.53           | 32.10            |
| <b>Linear range (ppb)</b>                   | 1–100           | 1–100            |
| <b>LOD (ppb)</b>                            | 16.90           | 22.75            |

**Table S3.** Performance of present method for the detection of As<sup>3+</sup> ion in water and cosmetic samples

| <b>Added<br/>(As<sup>3+</sup> ion,<br/>ppb)</b> | <b>Tap water</b> |                 | <b>Lake water</b> |                 | <b>Cosmetic sample</b> |                 |
|-------------------------------------------------|------------------|-----------------|-------------------|-----------------|------------------------|-----------------|
|                                                 | Found‡<br>(ppb)  | Recovery<br>(%) | Found‡<br>(ppb)   | Recovery<br>(%) | Found‡<br>(ppb)        | Recovery<br>(%) |
| <b>1.00</b>                                     | 0.99±0.0040      | 99.00           | 1.01±0.0005       | 101.00          | 0.96±0.0003            | 96.00           |
| <b>10.00</b>                                    | 10.01±0.0048     | 100.10          | 10.02±0.0008      | 100.20          | 10.20±0.0002           | 102.00          |
| <b>20.00</b>                                    | 20.02±0.0039     | 100.02          | 19.96±0.0009      | 99.80           | 20.01±0.0049           | 101.00          |
| <b>40.00</b>                                    | 40.00±0.0056     | 100.00          | 40.04±0.0009      | 100.40          | 38.24±0.0054           | 95.60           |
| <b>60.00</b>                                    | 60.20±0.0061     | 100.20          | 59.54±0.0008      | 99.20           | 58.80±0.0013           | 98.00           |
| <b>80.00</b>                                    | 79.60±0.0034     | 99.50           | 79.84±0.0008      | 99.80           | 80.60±0.0028           | 107.30          |
| <b>100.00</b>                                   | 101.20±0.0028    | 101.20          | 98.90±0.0006      | 98.90           | 100.10±0.007           | 100.10          |

‡Mean±standard deviation (n=3)
